# Supplementary material for: QTLs underlying natural variation of root growth angle among rice cultivars with the same functional allele of DEEPER ROOTING 1
Source: PubMed Central journal article supplement (PMC4385264; doi:10.1186/s12284-015-0049-2), 2015-03-21
Supplement: 12284_2015_49_MOESM1_ESM.pdf [file 12284_2015_49_MOESM1_ESM.pdf]

| Cultivar name    | Origin      | Sequence variation in cDNA of <i>DRO1</i> |        |       |         |       |         |        | Haplotype group <sup>b</sup> |  |
|------------------|-------------|-------------------------------------------|--------|-------|---------|-------|---------|--------|------------------------------|--|
|                  |             | 5'-UTR                                    | 5'-UTR | Exon3 | Exon3   | Exon4 | Exon4   | 3'-UTR |                              |  |
|                  |             | A/G                                       | C/T    | T/C   | A/C     | A/-   | C/A     | CT/--  |                              |  |
|                  |             | S.S.                                      |        |       | Leu/Phe | Stop  | Asp/Gly |        |                              |  |
|                  |             | 27 <sup>a</sup>                           | 150    | 617   | 752     | 943   | 962     | 1133-4 |                              |  |
| SNP              | SNP         | SNP                                       | SNP    | INDEL | SNP     | INDEL |         |        |                              |  |
| Kinandang Patong | Philippines | A                                         | C      | T     | A       | A     | C       | CT     | I                            |  |
| Bekogonomi       | Japan       | A                                         | C      | T     | A       | A     | C       | CT     | I                            |  |
| Fukuhibiki       | Japan       | A                                         | C      | T     | A       | A     | C       | CT     | I                            |  |
| Hoshiaoba        | Japan       | A                                         | C      | T     | A       | A     | C       | CT     | I                            |  |
| Kusahonami       | Japan       | A                                         | C      | T     | A       | A     | C       | CT     | I                            |  |
| Leafstar         | Japan       | A                                         | C      | T     | A       | A     | C       | CT     | I                            |  |
| Mizuhochikara    | Japan       | A                                         | C      | T     | A       | A     | C       | CT     | I                            |  |
| Momiroman        | Japan       | A                                         | C      | T     | A       | A     | C       | CT     | I                            |  |
| Natsuaoba        | Japan       | A                                         | C      | T     | A       | A     | C       | CT     | I                            |  |
| Tachisugata      | Japan       | A                                         | C      | T     | A       | A     | C       | CT     | I                            |  |
| Yumeaoba         | Japan       | A                                         | C      | T     | A       | A     | C       | CT     | I                            |  |
| Yumesakari       | Japan       | A                                         | C      | T     | A       | A     | C       | CT     | I                            |  |
| Habataki         | Japan       | A                                         | T      | T/C   | C       | A     | C       | -      | VII                          |  |
| Hokuriku 193     | Japan       | A                                         | T      | T/C   | C       | A     | C       | -      | VII                          |  |
| Minamiyutaka     | Japan       | A                                         | T      | T/C   | C       | A     | C       | -      | VII                          |  |
| Takanari         | Japan       | A                                         | T      | T/C   | C       | A     | C       | -      | VII                          |  |

**Figure S1. Sequence polymorphism in the transcribed region of *DRO1* among 16 rice cultivars**

S.S., synonymous substitution. <sup>a</sup> In/del or SNP position from the start of the 5' UTR. T/C in exon 3 of four accessions indicates heterozygous allele. <sup>b</sup> Numbering of each accession is based on the classification described in Uga et al. (2013a).
