# Supplementary material for: QTLs underlying natural variation of root growth angle among rice cultivars with the same functional allele of DEEPER ROOTING 1
Source: PubMed Central journal article supplement (PMC4385264; doi:10.1186/s12284-015-0049-2), 2015-03-21
Supplement: 12284_2015_49_MOESM4_ESM.pdf [file 12284_2015_49_MOESM4_ESM.pdf]

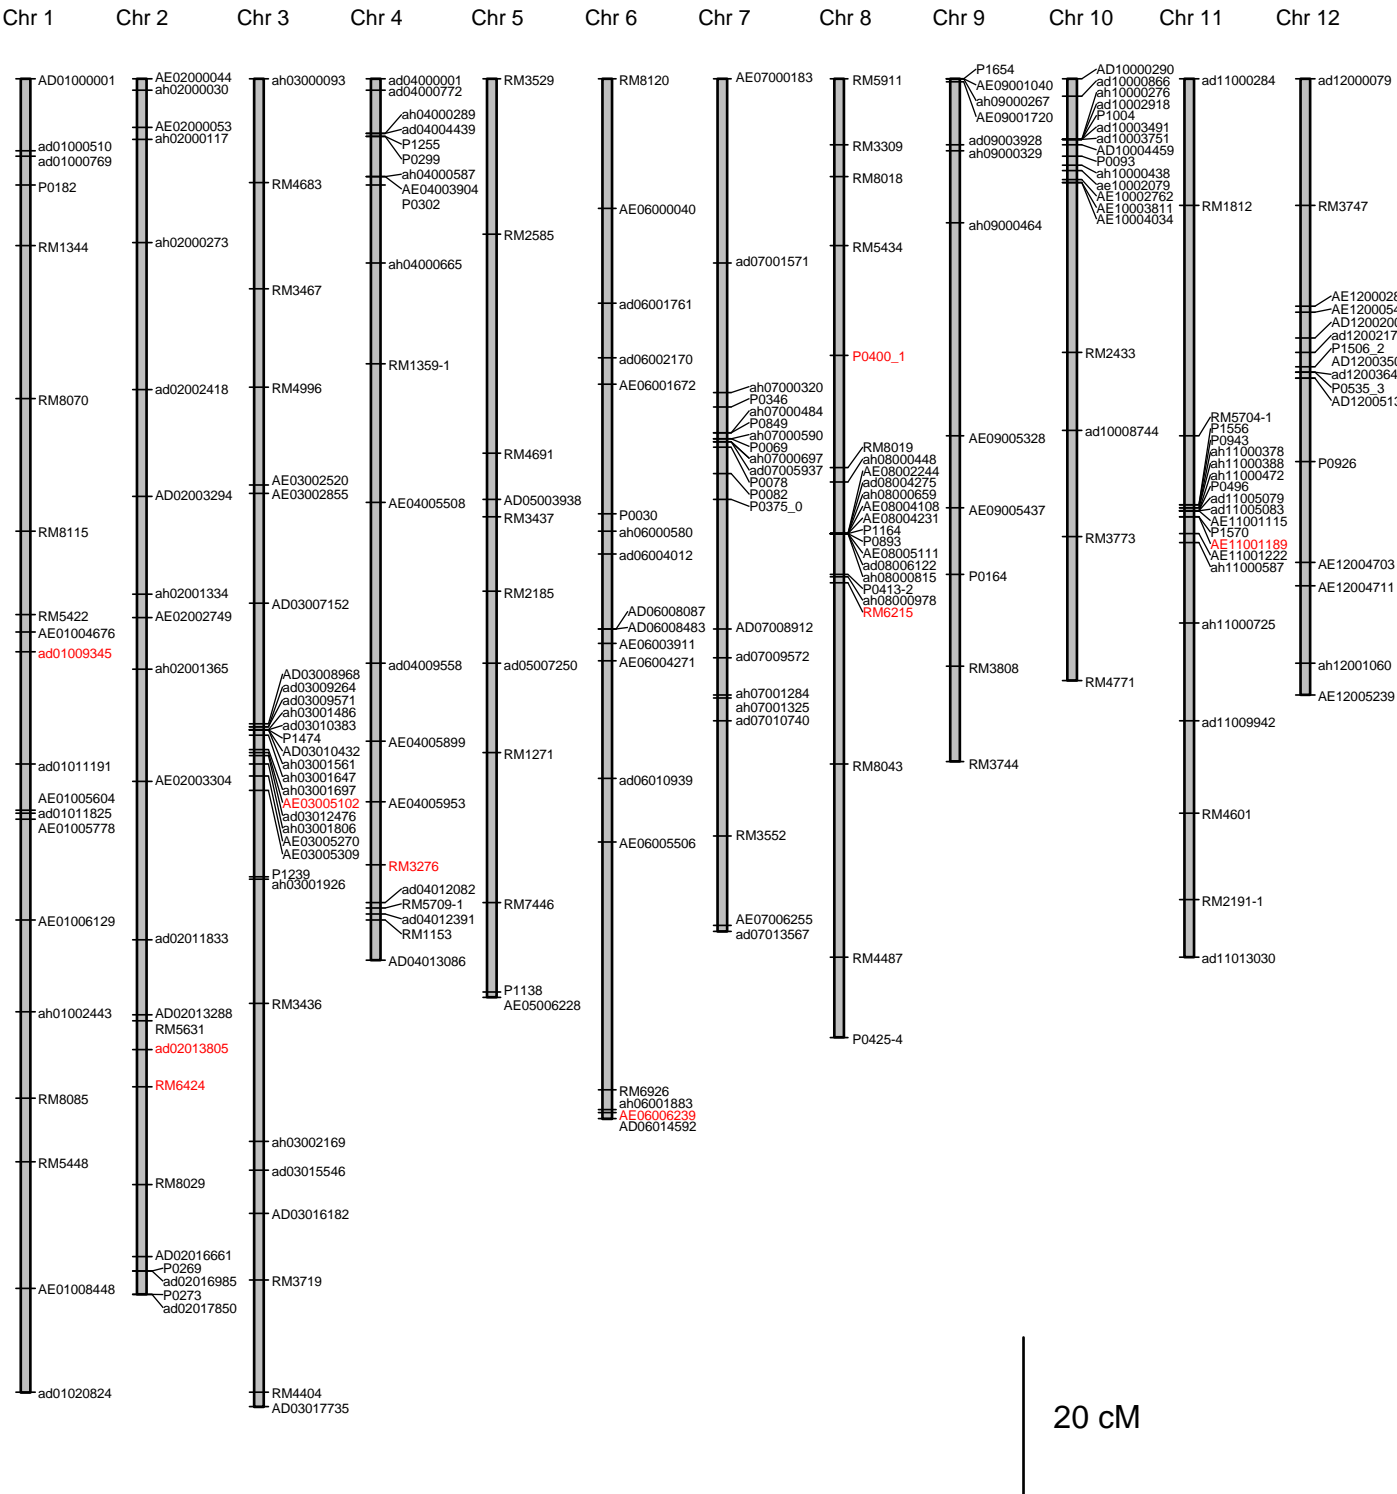

**Figure S4. Positions of the markers closest to the RDR50 and RDR70 QTLs detected in the F<sub>2</sub> population derived from a cross between Yumeaoba and Kinandang Patong (YuK-F2)**  
 Chromosome numbers are indicated above the linkage maps and the marker names are indicated to the right of each map. The markers nearest to the putative QTLs described in Table 1 are shown in red.
