# Supplementary material for: QTLs underlying natural variation of root growth angle among rice cultivars with the same functional allele of DEEPER ROOTING 1
Source: PubMed Central journal article supplement (PMC4385264; doi:10.1186/s12284-015-0049-2), 2015-03-21
Supplement: 12284_2015_49_MOESM7_ESM.pdf [file 12284_2015_49_MOESM7_ESM.pdf]

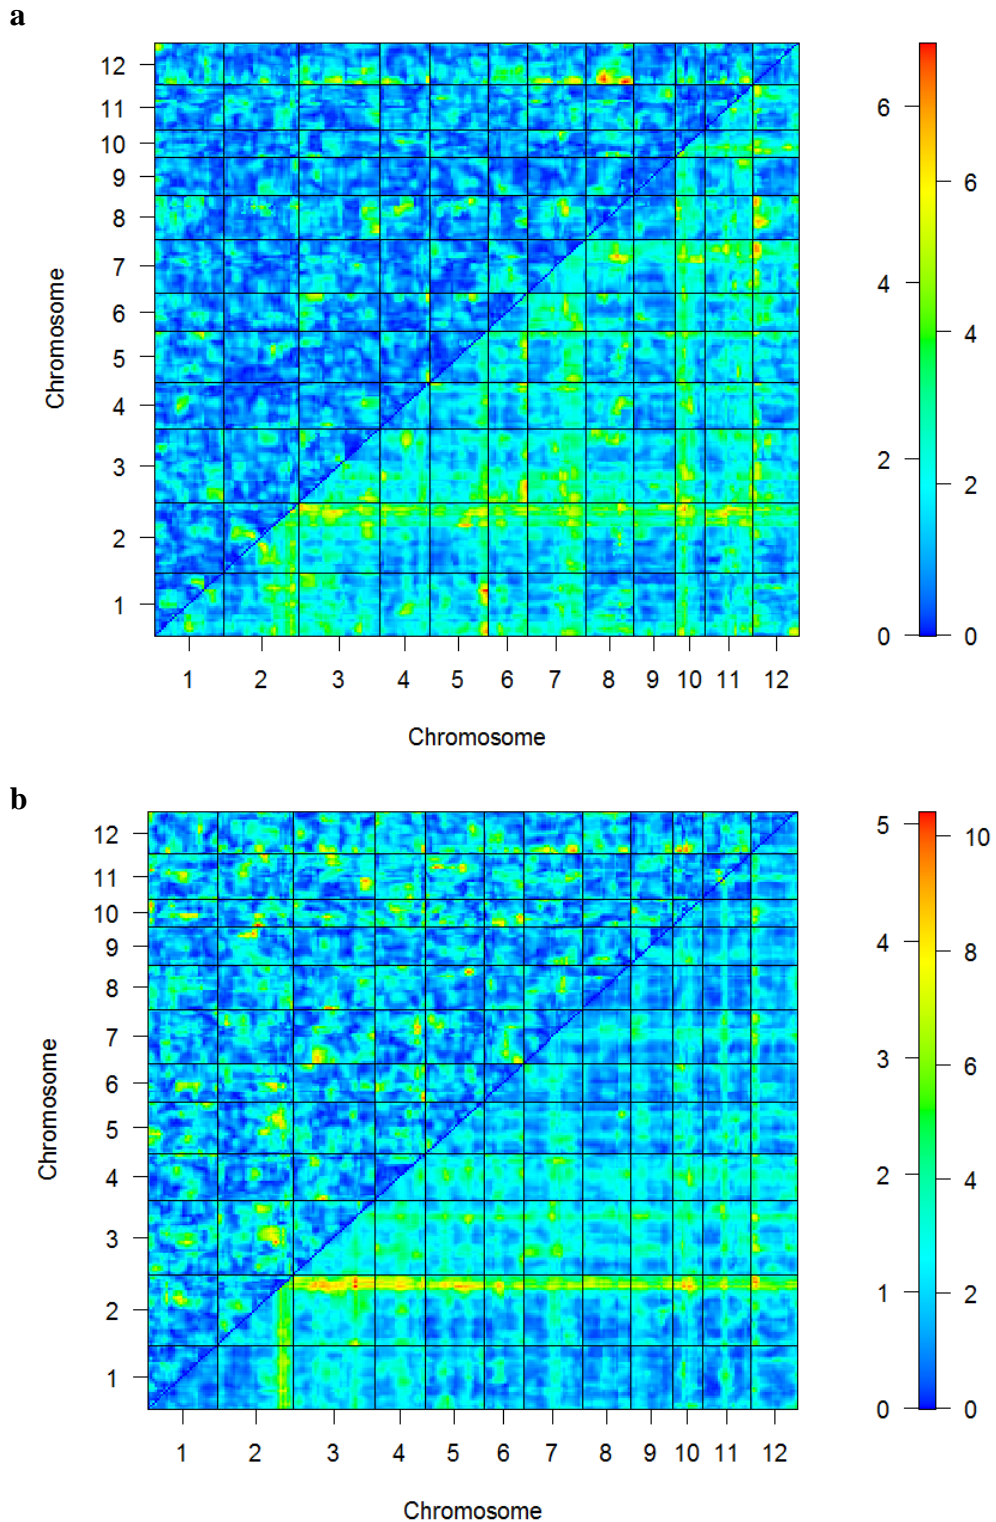

**Figure S7. Heat maps for a two-dimensional genome scan with a two-QTL model in TaK-F2**

(a) RDR50, (b) RDR70. Upper left triangle: maximum LOD score for the interaction model. Lower right triangle: maximum LOD score for the full model (two QTLs plus an interaction). Color-coded scales indicate the values for the interaction model on the left (LOD threshold = 6.36 for RDR50 and 6.24 for RDR70), and the full model on the right (LOD threshold = 9.13 for RDR50 and 9.34 for RDR70).
