# Supplementary material for: QTLs underlying natural variation of root growth angle among rice cultivars with the same functional allele of DEEPER ROOTING 1
Source: PubMed Central journal article supplement (PMC4385264; doi:10.1186/s12284-015-0049-2), 2015-03-21
Supplement: 12284_2015_49_MOESM8_ESM.pdf [file 12284_2015_49_MOESM8_ESM.pdf]

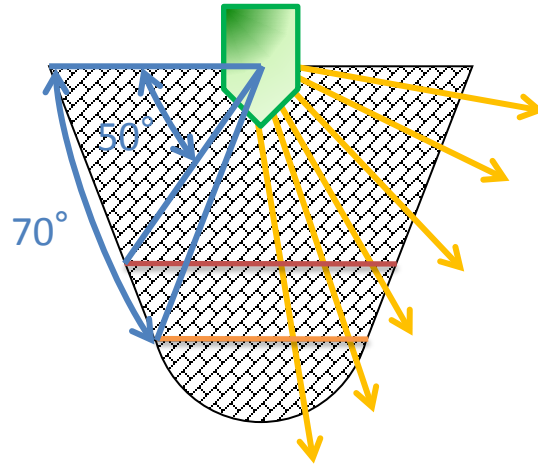

**Figure S8. Cross-sectional diagram of the basket method**

Yellow arrows represent roots elongating from the basket mesh. RDR50 and RDR70 were calculated as the numbers of roots that penetrated below the red line (root angle  $>50^\circ$ ) and orange line (root angle  $>70^\circ$ ), respectively, divided by the total number of roots that penetrated the whole mesh.
